# Supplementary material
Source: Springer Nature journal article supplement (https://www.springermedizin.de/resource/supplementary/13063_2014_2347_MOESM2_ESM.pdf/9621976)

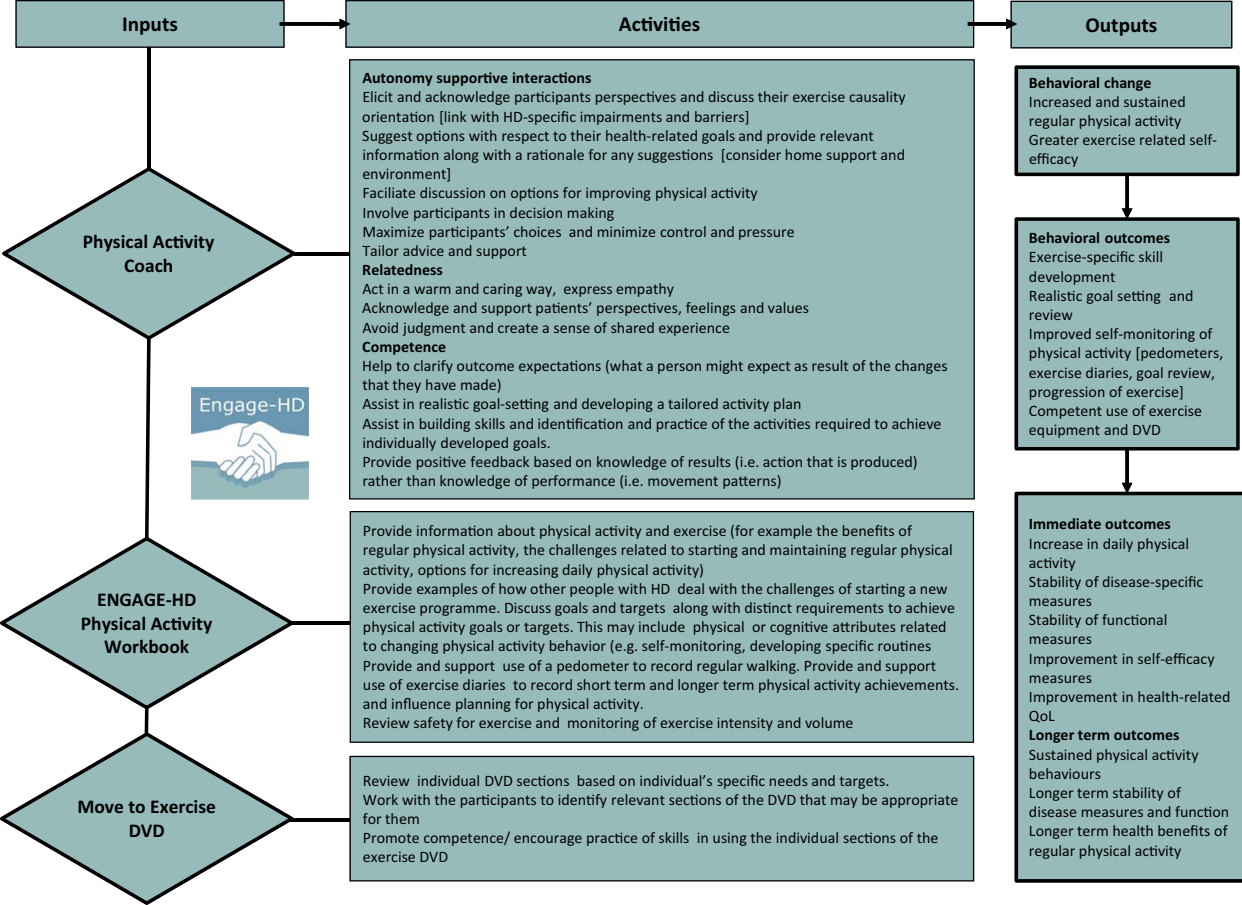

Supplement: MOESM2 [file 9621976]
